# Supplementary material for: Honeycomb-like porous chitosan films prepared via phase transition of poly(N-isopropylacrylamide) during water evaporation under ambient conditions
Source: Royal Society of Chemistry journal article supplement (doi:10.1039/d0ra03845h), 2020-01-01
Supplement: d0ra03845h1.pdf [file d0ra03845h1.pdf]

## 1 1. Cloud-point measurement with UV-Vis spectra

- 2 The cloud points of the solutions after 0, 12, 24, 36, 48, and 60 h were investigated (**Fig. S1**).
- 3 Cloud points of the solutions were 32, 32, 32, 32, 30, and 22 °C, respectively.

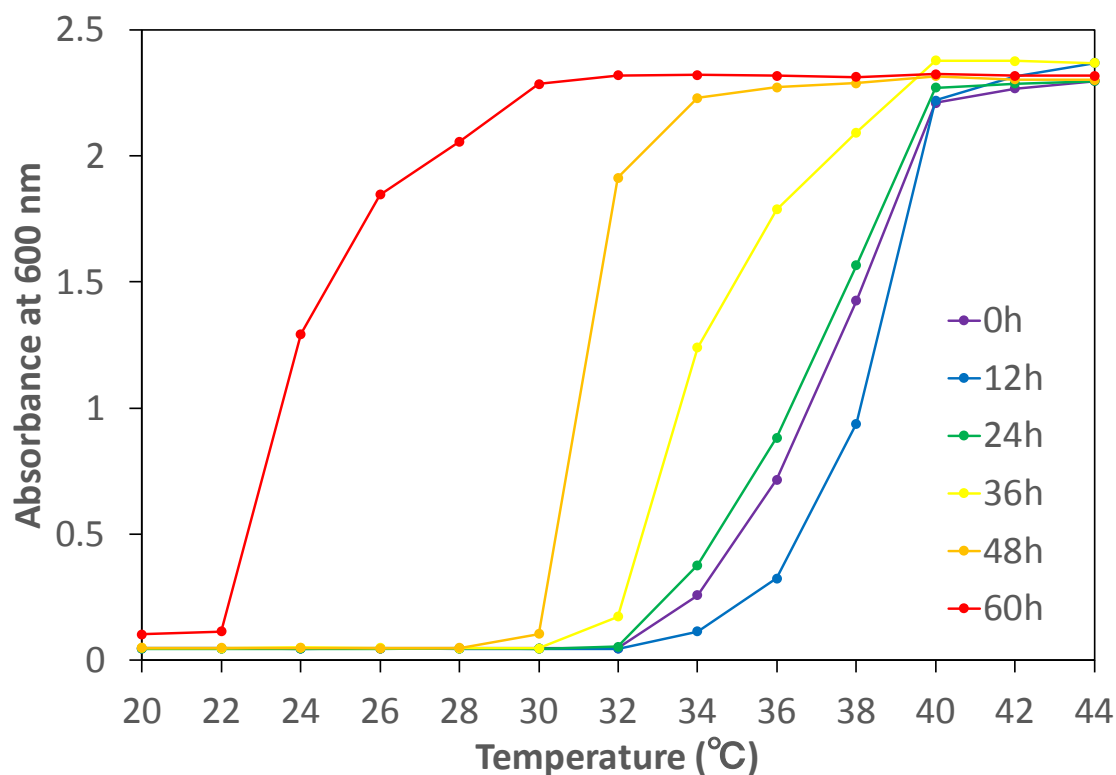

4

5 **Fig. S1.** Cloud-point measurements for CS-PNIPAm solutions after 0, 12, 24, 36, 48, and 60  
6 h.

7

## 8 2. <sup>1</sup>H NMR analysis of the obtained films

9 The CS/PNIPAm ratios of the obtained porous films were estimated from the <sup>1</sup>H NMR  
10 analysis where the integration ratios of signals **g**, **e**, and **a** were used for the calculation. The  
11 CS/PNIPAm ratios were calculated using the following equation:

$$12 \text{ CS/PNIPAm (g/g)} = \text{GlcNAc unit (g)} + \text{GlcN unit (g)} / \text{PNIPAm (g)} = \mathbf{g} \times 203.3 + \mathbf{e} \times 161.1 /$$

$$13 (\mathbf{a}/6) \times 113.1.$$

14 The amounts of remaining PNIPAm were estimated from the CS/PNIPAm ratio in the  
15 obtained films. These amounts in the 1.0/0.5, 1.0/1.0, and 1.0/1.5 feed ratios were 6.3%, 0.8%,

1 and 1.0%, respectively (**Fig. S2**). In the case of the 1.0/1.0 and 1.0/1.5 feed ratios using the  
 2 higher molecular weight CS, the amounts of remaining PNIPAm were 10.3% and 1.6%,  
 3 respectively (**Fig. S3**). Although most acetic acids were removed from the obtained films  
 4 after the immersion into methanol as shown in **Fig. S2** and **S3**, we suppose slight quantities of  
 5 acetic acids were included in the obtained films. However, their quantification with  $^1\text{H}$  NMR  
 6 analysis was difficult because the spectrum was overlapped by the signals attributed to  
 7 PNIPAm (**b**) and CS (**h**).

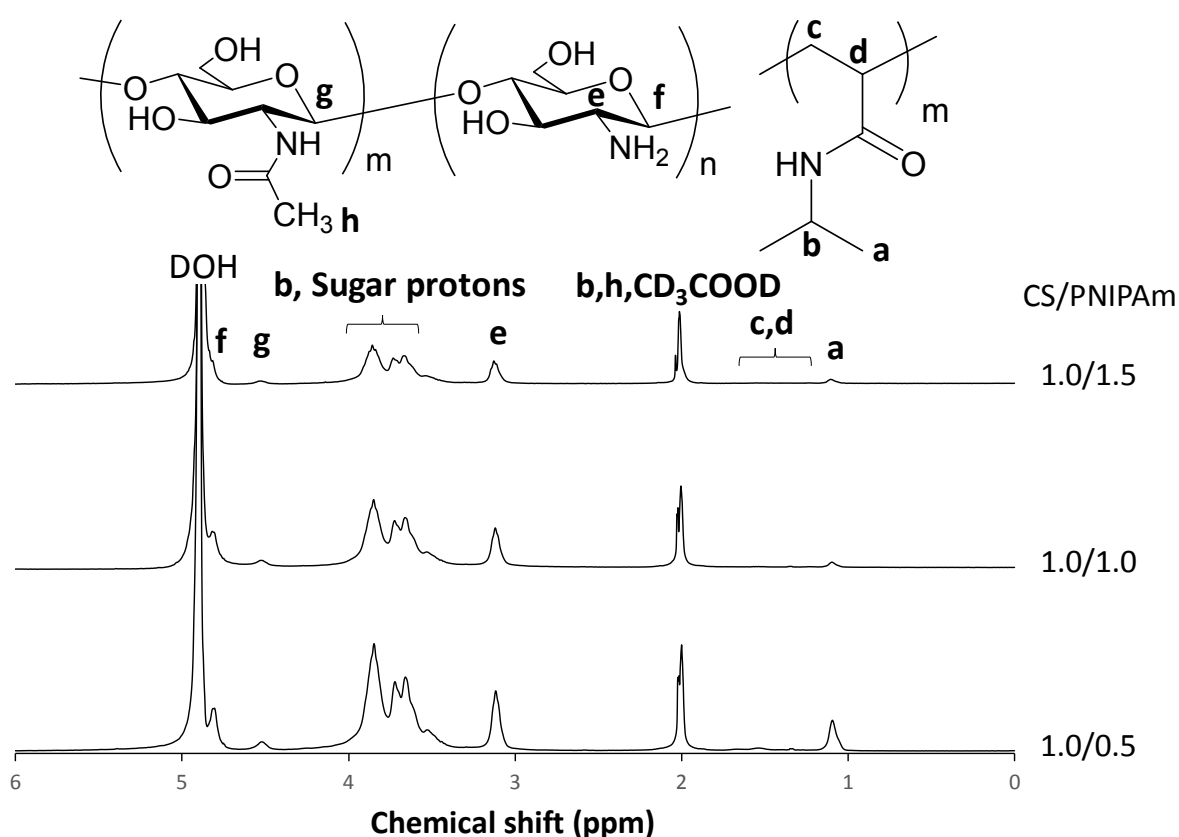

9 **Fig. S2.**  $^1\text{H}$  NMR spectra of the obtained porous films with the 1.0/0.5, 1.0/1.0, and 1.0/1.5  
 10 feed ratios (CS/PNIPAm) in 10%  $\text{CD}_3\text{COOD-D}_2\text{O}$ . The  $M_n$  values of CS and PNIPAm were  
 11  $64.1 \times 10^3$  and  $40.0 \times 10^3$ , respectively.

12

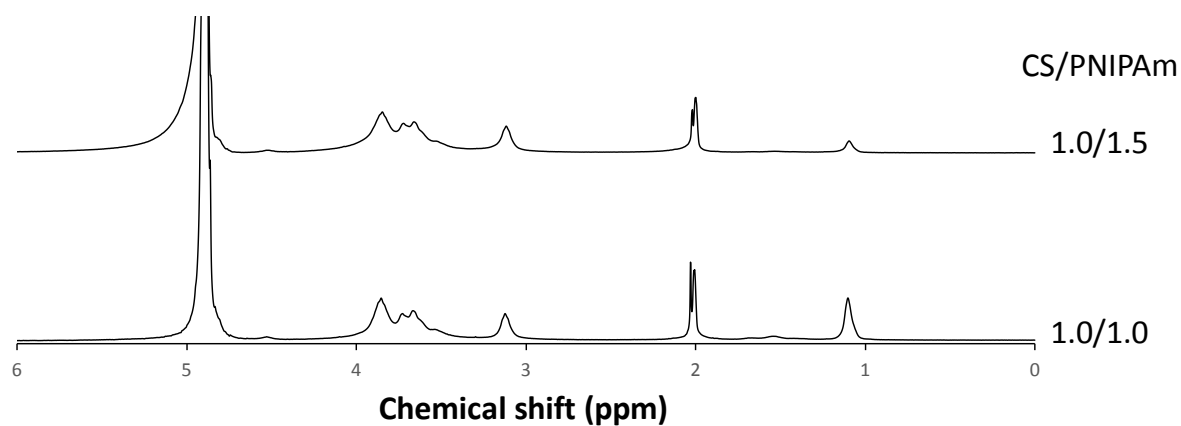

1

2 **Fig. S3.**  $^1\text{H}$  NMR spectra of obtained porous films with the 1.0/1.0 and 1.0/1.5 feed ratios  
3 (CS/PNIPAm) using the higher molecular weight CS ( $M_n = 162.4 \times 10^3$ ) in 10%  $\text{CD}_3\text{COOD}$ -  
4  $\text{D}_2\text{O}$ .

5

### 6 **3. Recyclability of the recovered PNIPAm**

7 The methanol solution containing the materials removed from the film was evaporated,  
8 and the residue was dried under reduced pressure. **Figure S4** shows the  $^1\text{H}$  NMR spectrum of  
9 these removed materials. In the spectrum, PNIPAm and a slight amount of acetic acid were  
10 observed.

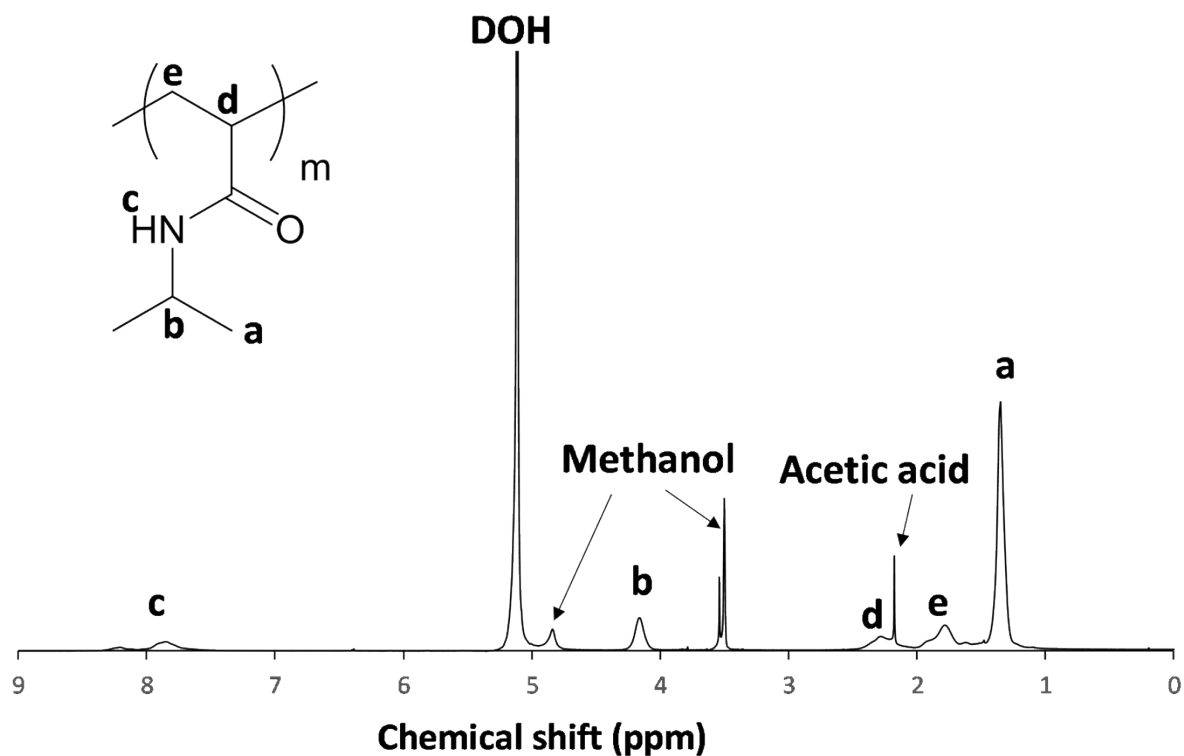

1

2 **Fig. S4.**  $^1\text{H}$  NMR spectrum of the materials removed by methanol in the 1.0/1.0 system in  
 3  $\text{CD}_3\text{OD}$ . The  $M_n$  values of CS and PNIPAm were  $64.1 \times 10$  and  $40.0 \times 10^3$ , respectively.

4

5 A honeycomb-porous film was prepared with the recovered PNIPAm (**Fig. S5**). The  
 6 pores observed in the film were the same as those from the original PNIPAm.

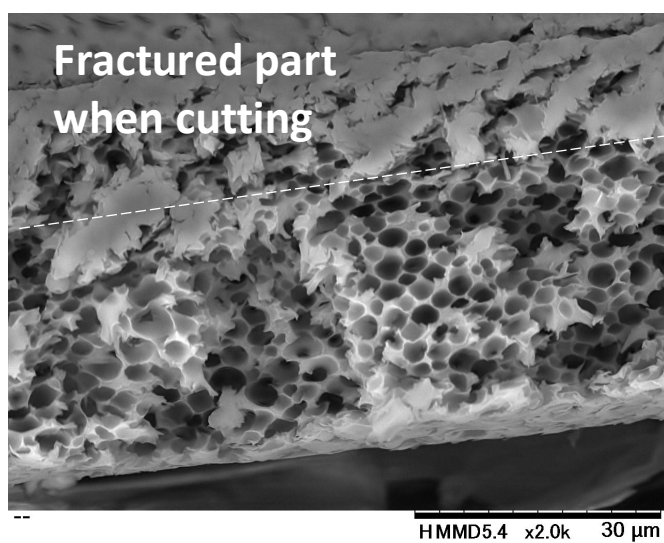

7

- 1 **Fig. S5.** The SEM image of the honeycomb-like porous film obtained with the 1.0/1.0 system
- 2 using the recovered PNIPAm.
